# Supplementary material for: SiO2 nanoparticles and diphenylcarbazide doped polymethylmethacrylate electrospun fibrous film for Cd2+ colorimetric detection
Source: Royal Society of Chemistry journal article supplement (doi:10.1039/c4ay00372a), 2014-01-01
Supplement: c4ay00372a1.pdf [file c4ay00372a1.pdf]

Electronic Supplementary Material (ESI) for Analytical Methods

SiO<sub>2</sub> nanoparticles and diphenylcarbazine doped  
polymethylmethacrylate electrospun fibrous film for Cd<sup>2+</sup>  
colorimetric detection

Tianyu Yao, Qin Tu, Xiang Han, Longlong Zhang, Dong-En Wang, Manlin Li, Sheng

Chen and Jinyi Wang\*

*College of Science, Northwest A&F University, Yangling, Shaanxi 712100, PR China*

\* Corresponding author. Tel. /fax: +86 29 87082520.

E-mail address: jywang@nwsuaf.edu.cn (J. Wang).

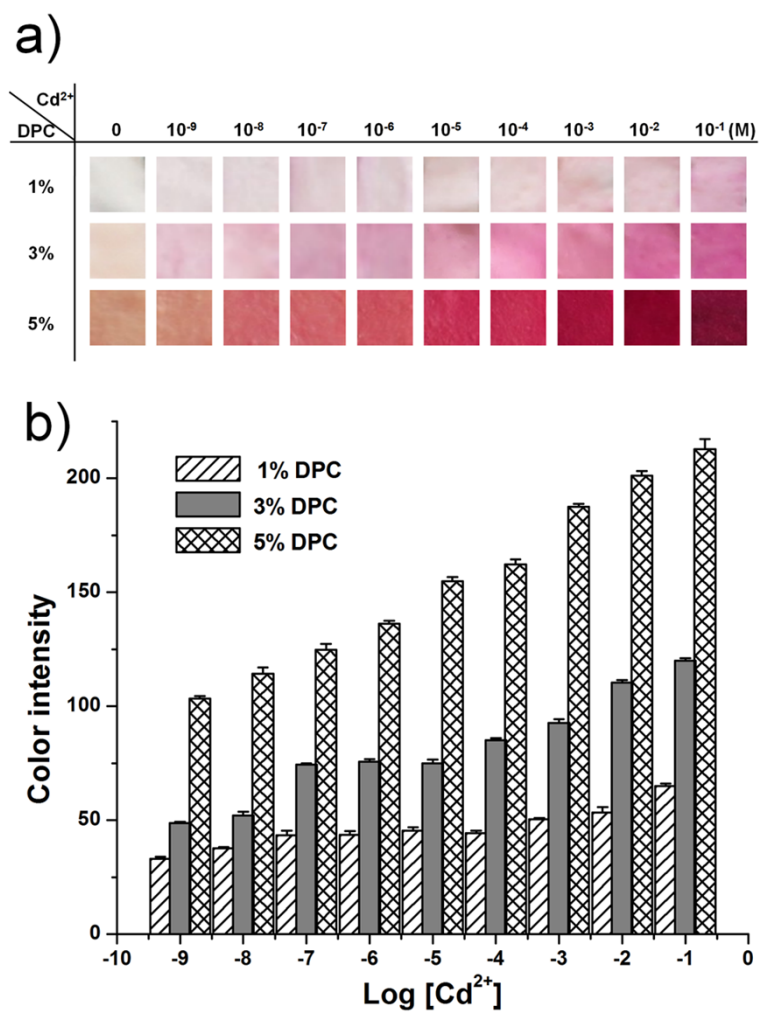

**Fig. S1** Optical images (a) of different concentration DPC doped PMMA fibrous films (30 wt% PMMA, 1 wt%, 3 wt% or 5 wt% DPC) after incubation with 10<sup>-4</sup> M Cd<sup>2+</sup> solution and their color intensity change (b) as a function of Cd<sup>2+</sup> concentration.

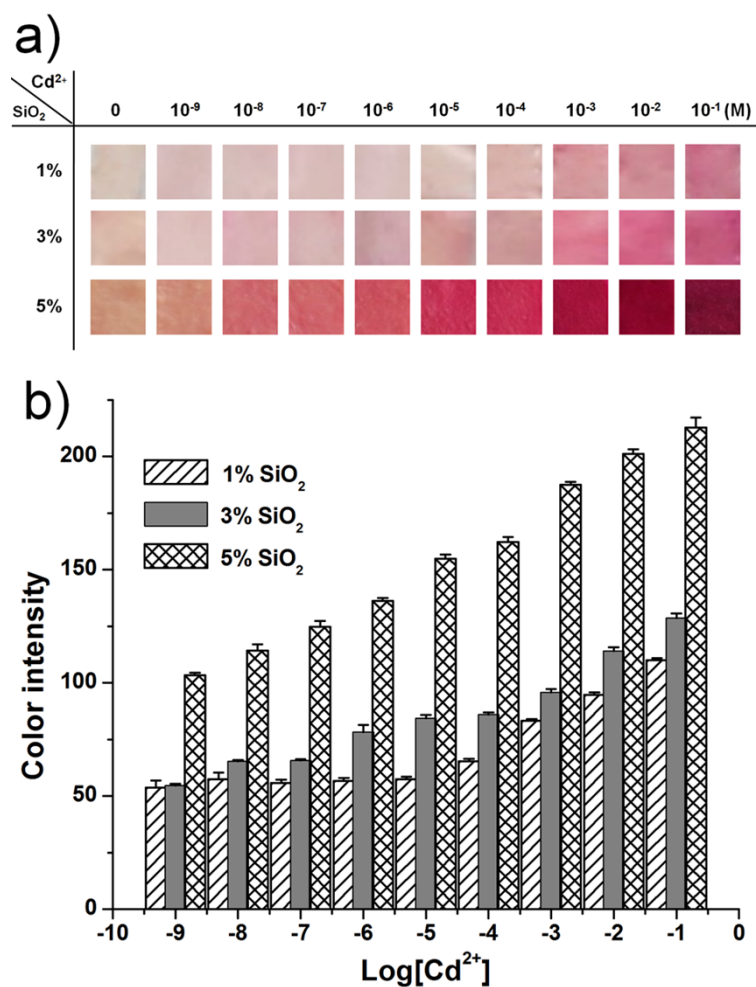

**Fig. S2** Optical images (a) of DPC and different concentration  $\text{SiO}_2$  nanoparticle doped PMMA fibrous films (30 wt% PMMA, 5 wt% DPC, and 1 wt%, 3 wt% or 5 wt%  $\text{SiO}_2$  nanoparticles) after incubation with  $10^{-4}$  M  $\text{Cd}^{2+}$  solution and their color intensity change (b) as a function of  $\text{Cd}^{2+}$  concentration.

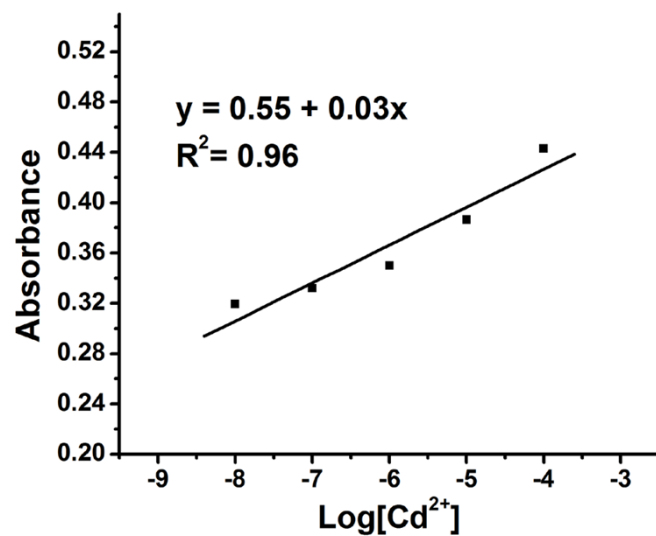

**Fig. S3** Calibration curve of absorbance intensity of SiO<sub>2</sub> nanoparticle doped PMMA fibrous films at 523 nm versus increasing concentration of Cd<sup>2+</sup>.

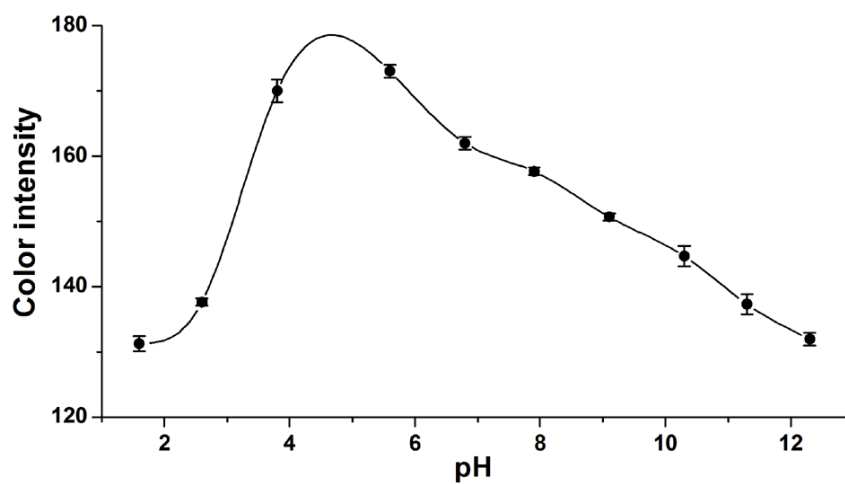

**Fig. S4** Color intensity change of SiO<sub>2</sub> nanoparticle and DPC doped PMMA fibrous film after incubation with 10<sup>-4</sup> M Cd<sup>2+</sup> solution with various pH values.
